# Supplementary material for: Sustainable and acceptable school meals through optimization analysis: an intervention study
Source: PubMed Central journal article supplement (PMC7315552; doi:10.1186/s12937-020-00579-z), 2020-06-24
Supplement: 12937_2020_579_MOESM1_ESM.pdf [file 12937_2020_579_MOESM1_ESM.pdf]

**Supplementary Table 1.** Dishes in the four-week baseline and new menu plans, respectively. The second dish at baseline is always vegetarian while in the new menu the first dish is. The meals are served with a salad buffet, bread and butter or margarine.

|        | Baseline                                                                                                      | New                                                                                                                          |
|--------|---------------------------------------------------------------------------------------------------------------|------------------------------------------------------------------------------------------------------------------------------|
| Week 1 |                                                                                                               |                                                                                                                              |
| Mon    | Smoked pork with Greek tomato sauce and grated cheese, bulgur<br>Broccoli gratin, bulgur                      | Broccoli gratin, bulgur<br>Bulgur with smoked pork sauce                                                                     |
| Tue    | Chicken with green pepper and tarragon sauce, rice<br>Quorn fillet with green pepper and tarragon sauce, rice | Quorn fillet with tarragon and pepper sauce, pommes chateau<br>Chicken fillet with tarragon and pepper sauce, pommes chateau |
| Wed    | Breaded fish patties with remoulade sauce, boiled potato<br>Vegetable patty, cold sauce, boiled potato        | Vegetable patty, cold sauce, boiled potatoes<br>Breaded fish patties with herb sauce, boiled potatoes                        |
| Thu    | Creamy potato soup, bread, cold cuts, fruit<br>Carrot soup, bread, cold cuts, fruit                           | Carrot soup, bread with carrot pesto, fruit<br>Potato and leek soup, bread with cheese, fruit                                |
| Fri    | Beef lasagne<br>Vegetarian lasagne                                                                            | Vegetarian moussaka<br>Middle Eastern stew with garlic yogurt, bulgur                                                        |
| Week 2 |                                                                                                               |                                                                                                                              |
| Mon    | Hen stew with curry sauce, rice<br>Ratatouille, bulgur                                                        | Chickpea ratatouille, bulgur<br>Hen with curry sauce, boiled potatoes                                                        |
| Tue    | Pasta gratin with feta cheese and spinach<br>Root vegetable hash with basil sauce                             | Colorful pasta wok with chili yogurt<br>Mediterranean pasta with pea pesto                                                   |
| Wed    | Oven baked fish with gremolata, boiled potatoes<br>Thai chickpea stew with red curry, potatoes                | Thai chickpea stew, rice<br>Oven baked fish with gremolata, boiled potatoes                                                  |
| Thu    | Baked sausage, potato<br>Vegetarian burritos                                                                  | Root vegetable patties with bulgur salad and cottage cheese<br>Root vegetable stew with sausage, boiled potatoes             |
| Fri    | Middle Eastern meat stew, yogurt, bulgur<br>Vegetarian moussaka                                               | Red lasagne with thyme and cottage cheese<br>Lasagne                                                                         |
| Week 4 |                                                                                                               |                                                                                                                              |
| Mon    | Pasta Carbonara<br>Pasta with spinach and garlic sauce                                                        | Pasta with spinach and garlic sauce<br>Pasta Carbonara                                                                       |
| Tue    | Coconut chicken with sweet chili sauce, yogurt, rice<br>Noodle stir-fry with soy strips and sweet chili sauce | Noodle wok with soy strips and sweet chili sauce<br>Coconut chicken with sweet chili sauce, rice                             |
| Wed    | Boiled fish with parsley sauce, boiled potato<br>Couscous hash, garlic sauce                                  | Couscous hash, red beans<br>Poached fish with parsley sauce, broccoli, lemon hummus, potato                                  |
| Thu    | Carrot soup with lentils, bread, cold cuts, fruit<br>Vegetarian goulash soup, bread, cold cuts, fruit         | Orange and carrot soup, bread, cold cuts and fruit<br>Vegetarian goulash soup, bread, cold cuts, fruit                       |
| Fri    | Meatloaf with sauce, boiled potatoes<br>Chickpea patties with oven baked vegetables, potatoes                 | Chickpea patties with roasted root vegetables and lentil cream<br>Beef and bean casserole with cream sauce, boiled potatoes  |
| Week 4 |                                                                                                               |                                                                                                                              |
| Mon    | Mediterranean gratin with pasta<br>Pasta with broccoli, spinach and cheese sauce                              | Root vegetable hash with curry sauce<br>Pasta gratin with feta cheese and spinach                                            |
| Tue    | Chicken nuggets with sweet and sour sauce, rice<br>Mung bean nuggets, with sweet and sour sauce, rice         | Burritos with vegetable pinto<br>Chicken nuggets with sweet and sour sauce, whole wheat                                      |
| Wed    | Fish patties with cold sauce, boiled potatoes<br>Carrot patties, cold sauce, boiled potatoes                  | Carrot patty, cold sauce, oven roasted potatoes<br>Fish patties with chili, with cold sauce, green peas, boiled potatoes     |
| Thu    | Pork gratin, wheatberries<br>Vegetarian pasta gratin                                                          | Vegetarian pasta gratin<br>Potato gratin with ham and pickled carrots                                                        |
| Fri    | Indian meat stew, rice<br>Indian lentil dhal                                                                  | Indian lentil dhal, fresh bread and fruit<br>Mungbean nuggets, with sweet and sour sauce, wheatberries                       |
