# Supplementary material for: Sustainable and acceptable school meals through optimization analysis: an intervention study
Source: PubMed Central journal article supplement (PMC7315552; doi:10.1186/s12937-020-00579-z), 2020-06-24
Supplement: 12937_2020_579_MOESM2_ESM.pdf [file 12937_2020_579_MOESM2_ESM.pdf]

**Supplementary Table 2.** Nutrient constraints applied during all linear optimization procedures.

| Upper and/or lower limits that the optimized food supply had to comply with | Lower limit | Upper limit |
|-----------------------------------------------------------------------------|-------------|-------------|
| Energy (kcal) <sup>a</sup>                                                  | 674         | 674         |
| Carbohydrates (%E)                                                          | 45          | 60          |
| Fat (%E)                                                                    | 22          | 40          |
| Protein (%E)                                                                | 10          | 20          |
| Fiber (%E) <sup>c</sup>                                                     | 2           | —           |
| Saturated fatty acids (%E)                                                  | —           | 10          |
| Mono/disaccharides (%E)                                                     | —           | 10          |
| Mono unsaturated fatty acids (%E)                                           | 10          | 20          |
| Poly unsaturated fatty acids (%E)                                           | 5           | 10          |
| Vitamin A (μg) <sup>b</sup>                                                 | 188         | —           |
| Vitamin D (μg) <sup>b</sup>                                                 | 3.1         | —           |
| Vitamin E (mg) <sup>b</sup>                                                 | 2.2         | —           |
| Thiamine (mg) <sup>b</sup>                                                  | 0.3         | —           |
| Riboflavin (mg) <sup>b</sup>                                                | 0.4         | —           |
| Vitamin C (mg) <sup>b</sup>                                                 | 16.0        | —           |
| Niacin (mg) <sup>b</sup>                                                    | 4.6         | —           |
| Vitamin B6 (mg) <sup>b</sup>                                                | 0.4         | —           |
| Vitamin B12 (μg) <sup>b</sup>                                               | 0.6         | —           |
| Folate (μg) <sup>b</sup>                                                    | 62.7        | —           |
| Phosphor (mg) <sup>b</sup>                                                  | 199         | —           |
| Iodine (μg) <sup>b</sup>                                                    | 43.2        | —           |
| Iron (mg) <sup>b</sup>                                                      | 3.4         | —           |
| Calcium (mg) <sup>b</sup>                                                   | 282         | —           |
| Potassium (mg) <sup>b</sup>                                                 | 971         | —           |
| Magnesium (mg) <sup>b</sup>                                                 | 87.7        | —           |
| Salt (g) <sup>c</sup>                                                       | —           | 3.6         |
| Selenium (μg) <sup>b</sup>                                                  | 12.5        | —           |
| Zink (mg) <sup>b</sup>                                                      | 3.4         | —           |
| Omega-3 fatty acids (%E) <sup>b</sup>                                       | 3.3         | —           |

<sup>a</sup>Based on 30% of daily estimated energy requirement (EER) for an average pupil, 10-12 years, both sexes.

<sup>b</sup>Lower limit based on 30% of daily recommended intakes (RIs) for an average pupil, 10-12 years, both sexes.

<sup>c</sup>Upper limit based on 30% of daily recommended intake (RIs) for an average pupil, 10-12 years, both sexes.
