# Supplementary material for: Sustainable and acceptable school meals through optimization analysis: an intervention study
Source: PubMed Central journal article supplement (PMC7315552; doi:10.1186/s12937-020-00579-z), 2020-06-24
Supplement: 12937_2020_579_MOESM3_ESM.pdf [file 12937_2020_579_MOESM3_ESM.pdf]

**Supplementary Figure 1.** Questionnaire about satisfaction with school meals.

**In what grade are you? \***

- Grade 5
- Grade 8

**Are you a girl or a boy?**

- Girl
- Boy

**How often do you usually eat lunch in the school restaurant? \***

How often do you take food from the school restaurant, even if it is just a sandwich?

- Never or almost never
- 1 day a week
- 2 days a week
- 3 days a week
- 4 days a week
- 5 days a week

**If you sometimes do not eat from the hot, cooked school lunch, what is most often the reason? \***

Only chose one alternative.

- I always eat the school lunch!
- I am not hungry
- I do not think the food tastes good
- I do not have enough time
- I do not like the environment in the school restaurant
- My friends do not eat the school lunch
- Other

## The food

Now think about how you usually feel about the school lunch. Try not only to think of today's or yesterday's lunch!

Which face seems to represent what you think about the questions below? Put a cross in the box below the correct face.

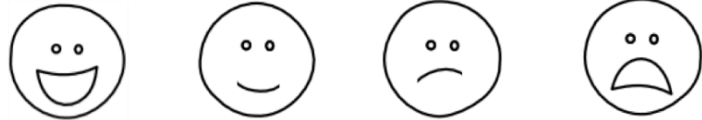

|                                                    | Always                   | Almost always            | Rarely                   | Never                    |
|----------------------------------------------------|--------------------------|--------------------------|--------------------------|--------------------------|
| Does the food taste good? *                        | <input type="checkbox"/> | <input type="checkbox"/> | <input type="checkbox"/> | <input type="checkbox"/> |
| Do you usually feel full after eating the lunch? * | <input type="checkbox"/> | <input type="checkbox"/> | <input type="checkbox"/> | <input type="checkbox"/> |

**Do you have a non-standard diet?** For example due to allergy, intolerance, religion or other. The question is voluntary to answer.

- Yes
- No
- Don't know

## Time

Now think about the time you usually have for eating the school lunch. Try not only to think of today's or yesterday's lunch!

|                                                            | Always                   | Almost always            | Rarely                   | Never                    |
|------------------------------------------------------------|--------------------------|--------------------------|--------------------------|--------------------------|
| Do you always have enough time to eat your school lunch? * | <input type="checkbox"/> | <input type="checkbox"/> | <input type="checkbox"/> | <input type="checkbox"/> |

## Noise levels

Now think about how the school restaurant usually is. Try not only to think of today's or yesterday's lunch!

|  | Always                   | Almost always            | Rarely                   | Never                    |
|--|--------------------------|--------------------------|--------------------------|--------------------------|
|  | <input type="checkbox"/> | <input type="checkbox"/> | <input type="checkbox"/> | <input type="checkbox"/> |

**Is the noise level in the school restaurant ok/acceptable? \***

**The food you take but do not eat**

|                                                    | <b>Always</b>            | <b>Almost always</b>     | <b>Rarely</b>            | <b>Never</b>             |
|----------------------------------------------------|--------------------------|--------------------------|--------------------------|--------------------------|
| <b>How often do you leave food on the plate? *</b> | <input type="checkbox"/> | <input type="checkbox"/> | <input type="checkbox"/> | <input type="checkbox"/> |

**If you leave food on your plate, what is usually the reason for that? \***

**Only chose one alternative.**

- I never leave food on my plate!
- I am not as hungry as I think I am
- The food does not taste as good as I think
- I take too much food as I am afraid that the food will run out
- I don't have enough time to eat everything
- I don't know why

### **Overall rating**

Now think about the school lunch as a whole. Which face seems to represent what you think about the question below? Put a cross in the box below the correct face.

|                                                                          |  |  |  |  |                          |
|--------------------------------------------------------------------------|-------------------------------------------------------------------------------------|-------------------------------------------------------------------------------------|---------------------------------------------------------------------------------------|---------------------------------------------------------------------------------------|--------------------------|
|                                                                          | <b>Very good</b>                                                                    | <b>Good</b>                                                                         | <b>Less good</b>                                                                      | <b>Bad</b>                                                                            | <b>Don't know</b>        |
| <b>What overall grade do you give the school lunch at your school? *</b> | <input type="checkbox"/>                                                            | <input type="checkbox"/>                                                            | <input type="checkbox"/>                                                              | <input type="checkbox"/>                                                              | <input type="checkbox"/> |

**Do you have any suggestions on how the school lunch at your school can be improved?**

**Please write here!**
